# Supplementary material
Source: PubMed Central journal article supplement (PMC10391046)
Supplement: jmcp.2021.27.6.696_s001.pdf [file jmcp.2021.27.6.696_s001.pdf]

## **SUPPLEMENTARY MATERIALS**

### **Prescription drug coverage satisfaction, cost-reducing behavior, and medication nonadherence among Medicare beneficiaries with type 2 diabetes**

Qing He, MSc; Ciara L Silverman, BS; Chanhyun Park, PhD; Georgianne F Tiu, DrPH, MPH; and Boon Peng Ng, PhD

#### **Supplementary Table 1: Survey questions that measured the dependent variable and key factors of interest**

#### **Supplementary Table 2: Factors associated with medication nonadherence measured by a single variable among Medicare beneficiaries aged $\geq 65$ years with T2D, 2016 MCBS PUF**

**Supplementary Table 1: Survey questions that measured the dependent variable and key factors of interest**

| Variable                                                           | Question and response levels based on 2016 MCBS PUF                                                                                                                                                                                                                                                                                                                                                                                                                                                                                                                                |
|--------------------------------------------------------------------|------------------------------------------------------------------------------------------------------------------------------------------------------------------------------------------------------------------------------------------------------------------------------------------------------------------------------------------------------------------------------------------------------------------------------------------------------------------------------------------------------------------------------------------------------------------------------------|
| Type 2 Diabetes                                                    | <p>Has a doctor ever told [you/(SP)] that (you/he/she) had any type of diabetes, including: sugar diabetes, high blood sugar, (borderline diabetes, pre-diabetes, or pregnancy-related diabetes/borderline diabetes, or pre-diabetes)?</p> <p>Response: yes, no, refused, don't know, inapplicable/missing</p>                                                                                                                                                                                                                                                                     |
| Medication Nonadherence                                            | <p>Please tell me which type of diabetes the doctor or other health professional said that [you have/(SP) has].</p> <p>Response: Type 1, Type 2, borderline, other, refused, inapplicable/missing</p> <p>[Have you/has (SP)] often, sometimes, or never... skipped doses to make the medicine last longer?</p> <p>Response: often, sometimes, never, refused, don't know, inapplicable/missing</p>                                                                                                                                                                                 |
| Dissatisfaction: the amount paid for medications                   | <p>[Have you/has (SP)] often, sometimes, or never... taken smaller doses than prescribed of a medicine to make the medicine last longer?</p> <p>Response: often, sometimes, never, refused, don't know, inapplicable/missing</p>                                                                                                                                                                                                                                                                                                                                                   |
| Dissatisfaction: the medications on formulary                      | <p>[Please tell me how satisfied you have been with . . .] The amount [you have/(SP) has] to pay for [your/(SP's)] prescribed medicines.</p> <p>Response: very satisfied, satisfied, dissatisfied, very dissatisfied, refused, don't know, inapplicable/missing, no experience</p> <p>[Please tell me how satisfied you have been with . . .] [Your/(SP's)] prescription drug plan's formulary or the list of drugs covered by the plan.</p> <p>Response: very satisfied, satisfied, dissatisfied, very dissatisfied, refused, don't know, inapplicable/missing, no experience</p> |
| Dissatisfaction: find a pharmacy that accepted medication coverage | <p>[Please tell me how satisfied you have been with . . .] The ease of finding a pharmacy which accepts your prescription drug plan.</p> <p>[EXPLAIN IF NECESSARY: By prescription drug plan, we mean any health insurance plan that provides drug coverage.]</p> <p>Response: very satisfied, satisfied, dissatisfied, very dissatisfied, refused, don't know, inapplicable/missing, no experience</p>                                                                                                                                                                            |

Ever spent less on basic  
needs to save for  
medications

Have you/has (SP) often, sometimes, or never...spent less money on  
food, heat, or other basic needs so that (you/he/she) would have  
money for medicine?

Response: often, sometimes, never, refused, don't know,  
inapplicable/missing

---

**Supplementary Table 2: Factors associated with medication nonadherence measured by a single variable among Medicare beneficiaries aged  $\geq 65$  years with T2D, 2016 MCBS PUF**

| Model/Variable                    | Skipped doses    |                     |         | Taken smaller doses |           |         |
|-----------------------------------|------------------|---------------------|---------|---------------------|-----------|---------|
|                                   | OR <sup>a</sup>  | 95% CI <sup>b</sup> | p-value | OR                  | 95% CI    | p-value |
| Socio-demographic Characteristics |                  |                     |         |                     |           |         |
| Age group                         |                  |                     |         |                     |           |         |
| 65-75 years                       | 3.67             | 1.81-6.66           | <0.001  | 2.60                | 1.40-4.84 | 0.003   |
| $\geq 75$ years                   | Ref <sup>c</sup> |                     |         | Ref                 |           |         |
| Sex                               |                  |                     |         |                     |           |         |
| Female                            | Ref              |                     |         | Ref                 |           |         |
| Male                              | 0.57             | 0.29-1.13           | 0.105   | 0.85                | 0.48-1.50 | 0.571   |
| Race/ethnicity                    |                  |                     |         |                     |           |         |
| White                             | Ref              |                     |         | Ref                 |           |         |
| Black                             | 0.56             | 0.17-1.79           | 0.320   | 1.50                | 0.73-3.07 | 0.266   |
| Hispanic                          | 0.63             | 0.19-2.06           | 0.443   | 1.17                | 0.54-2.53 | 0.696   |
| Other                             | 0.86             | 0.18-4.06           | 0.847   | 1.20                | 0.48-3.03 | 0.697   |
| Marital status                    |                  |                     |         |                     |           |         |
| Married                           | Ref              |                     |         | Ref                 |           |         |
| Widowed                           | 2.11             | 0.90-4.97           | 0.085   | 1.42                | 0.69-2.92 | 0.336   |
| Divorced/separated                | 1.99             | 0.84-4.72           | 0.116   | 2.13                | 1.06-4.27 | 0.034   |
| Never married                     | 3.12             | 0.85-11.42          | 0.085   | 1.20                | 0.43-3.30 | 0.728   |
| Education                         |                  |                     |         |                     |           |         |
| Less than HS                      | Ref              |                     |         | Ref                 |           |         |
| HS or vocational                  | 1.18             | 0.46-3.02           | 0.732   | 1.18                | 0.59-2.37 | 0.643   |
| More than HS                      | 0.81             | 0.29-2.23           | 0.678   | 1.04                | 0.48-2.25 | 0.912   |
| Income                            |                  |                     |         |                     |           |         |
| < \$25,000                        | 0.76             | 0.40-1.44           | 0.400   | 0.88                | 0.49-1.57 | 0.657   |
| $\geq$ \$25,000                   | Ref              |                     |         | Ref                 |           |         |
| Residing area                     |                  |                     |         |                     |           |         |
| Non-metro area                    | 0.85             | 0.40-1.79           | 0.665   | 1.00                | 0.54-1.84 | 0.998   |
| Metro                             | Ref              |                     |         | Ref                 |           |         |
| Comorbidities and Health Status   |                  |                     |         |                     |           |         |
| Number of chronic conditions      |                  |                     |         |                     |           |         |
| 0-1                               | Ref              |                     |         | Ref                 |           |         |
| 2-3                               | 2.36             | 0.70-7.88           | 0.162   | 1.78                | 0.83-3.83 | 0.137   |
| $\geq 4$                          | 1.86             | 0.40-8.67           | 0.428   | 1.41                | 0.56-3.53 | 0.463   |

|                                                                    |      |            |       |      |            |       |
|--------------------------------------------------------------------|------|------------|-------|------|------------|-------|
| ADL limitations                                                    |      |            |       |      |            |       |
| No limitations                                                     | Ref  |            |       | Ref  |            |       |
| Only IADLs limited                                                 | 1.46 | 0.55-3.87  | 0.439 | 2.18 | 0.96-4.98  | 0.064 |
| 1-2 ADLs limited                                                   | 1.01 | 0.49-2.09  | 0.979 | 1.55 | 0.82-2.95  | 0.178 |
| ≥ 3 ADLs limited                                                   | 0.88 | 0.30-2.56  | 0.815 | 1.97 | 0.87-4.48  | 0.104 |
| General health status                                              |      |            |       |      |            |       |
| Excellent/very good                                                | Ref  |            |       | Ref  |            |       |
| Good                                                               | 1.42 | 0.57-3.54  | 0.452 | 1.08 | 0.50-2.32  | 0.851 |
| Fair/poor                                                          | 1.40 | 0.53-3.73  | 0.498 | 0.91 | 0.40-2.06  | 0.814 |
| Drug Coverage                                                      |      |            |       |      |            |       |
| Medicare advantage plan coverage                                   |      |            |       |      |            |       |
| No                                                                 | Ref  |            |       | Ref  |            |       |
| Yes                                                                | 1.10 | 0.61-2.01  | 0.744 | 1.12 | 0.61-2.05  | 0.717 |
| Private plan coverage                                              |      |            |       |      |            |       |
| No                                                                 | Ref  |            |       | Ref  |            |       |
| Yes                                                                | 1.45 | 0.49-4.28  | 0.495 | 1.30 | 0.58-2.92  | 0.523 |
| Part D plan coverage                                               |      |            |       |      |            |       |
| No                                                                 | Ref  |            |       | Ref  |            |       |
| Yes                                                                | 3.51 | 0.28-44.76 | 0.330 | 2.62 | 0.45-15.37 | 0.283 |
| Prescription Drug Insurance Satisfaction                           |      |            |       |      |            |       |
| Dissatisfaction: the amount paid for medications                   |      |            |       |      |            |       |
| No                                                                 | Ref  |            |       | Ref  |            |       |
| Yes                                                                | 2.42 | 1.12-5.24  | 0.025 | 2.46 | 1.36-4.44  | 0.003 |
| Dissatisfaction: the medications on formulary                      |      |            |       |      |            |       |
| No                                                                 | Ref  |            |       | Ref  |            |       |
| Yes                                                                | 1.37 | 0.61-3.05  | 0.443 | 2.09 | 1.17-3.73  | 0.014 |
| Dissatisfaction: find a pharmacy that accepted medication coverage |      |            |       |      |            |       |
| No                                                                 | Ref  |            |       | Ref  |            |       |
| Yes                                                                | 1.25 | 0.30-5.23  | 0.760 | 4.21 | 0.82-21.64 | 0.085 |
| Cost-reducing Behavior                                             |      |            |       |      |            |       |
| Ever spent less on basic needs to save for medications             |      |            |       |      |            |       |
| No                                                                 | Ref  |            |       | Ref  |            |       |
| Yes                                                                | 2.40 | 1.06-5.45  | 0.037 | 1.85 | 0.91-3.75  | 0.089 |

<sup>a</sup> Odds ratio

<sup>b</sup> Confidence interval

<sup>c</sup> Reference group
